# Supplementary material for: AI-Enabled Framework for Automated Pendelluft Detection in Critically Ill Patients Using Electrical Impedance Tomography
Source: Research Square preprint supplement (doi:10.21203/rs.3.rs-6605707/v1), 2025-05-19
Supplement: Supplementary file 2 [file 922643081a3b67cedcc469b5.docx]

**eAppendix 4: CONSORT-AI Checklist**

Title and Abstract

- ☐1a. AI Intervention Identification

- Title clearly identifies study as AI diagnostic evaluation: "Assessment of ChatGPT for Automated Analysis of Pendelluft Phenomena Using Electrical Impedance Tomography"

- Specifies AI system (ChatGPT) and clinical application (EIT analysis)

- ☐1b. Structured Summary

- Background: EIT interpretation challenges and AI potential

- Methods: Multicenter diagnostic study design, 278 patients

- Results: Performance metrics (AUC 0.91, sensitivity 89.6%, specificity 92.1%)

- Conclusions: ChatGPT's superior performance and clinical implications

Introduction

- ☐2a. Scientific Background and Rationale

- Current challenges in EIT interpretation

- Limitations of existing approaches

- Rationale for using ChatGPT

- Previous evidence on AI in medical imaging

- Clinical need for automated analysis

- ☐2b. Specific Objectives

- Primary: Evaluate ChatGPT's diagnostic accuracy

- Secondary:

Compare cost-effectiveness

Assess clinical outcomes

Validate across multiple centers

Methods

- ☐3a. Trial Design

- Study type: Multicenter retrospective diagnostic study

- Validation approach: Internal and external

- Comparison groups: ChatGPT vs. conventional ML vs. expert assessment

- Timeline: January 2020 - December 2024

- ☐3b. Changes to Methods

- Protocol modifications:

Sample size adjustment for center effects

Additional validation cohort

Extended follow-up period

- Rationale for changes

- Impact on study integrity

- ☐4a. Eligibility Criteria

- Inclusion criteria:

Adult patients (≥18 years)

Mechanical ventilation with pressure support

EIT monitoring

Complete clinical data

- Exclusion criteria:

Incomplete EIT recordings

Poor signal quality (SQI <90%)

Chest wall deformities

Severe hemodynamic instability

Incomplete follow-up

- ☐4b. Settings and Locations

- Study centers:

Ruijin Hospital (n=120)

PUMCH (n=98)

Fujian Provincial Hospital (n=60)

- Center characteristics:

All tertiary teaching hospitals

Standardized EIT protocols

Similar patient populations

- Data collection period:

Recruitment: 2020-2024

Follow-up completion: 2024
