# Supplementary material for: AI-Enabled Framework for Automated Pendelluft Detection in Critically Ill Patients Using Electrical Impedance Tomography
Source: Research Square preprint supplement (doi:10.21203/rs.3.rs-6605707/v1), 2025-05-19
Supplement: Supplementary file 3 [file c9e9f4e2def11030b3d30382.docx]

**eAppendix 3:**

**1.Additional Statistical Analyses**

**1. Detailed Statistical Methods**

1.1 Power Analysis

Objective: To determine if sample size was adequate to detect statistical significance in predictive models.

Methods:

- Assumed model AUC ≥ 0.85, baseline AUC = 0.75, effect size = 0.10 [27]

- Set significance level α = 0.05, statistical power 1-β = 0.90 [28]

- Using DeLong method for AUC comparison, requiring minimum 240 patients

- Conclusion: Study inclusion of 278 patients provided adequate power to detect model performance differences.

1.2 Handling Missing Data

Methods:

- Examined missing data patterns (MCAR, MAR, etc.)

- Implemented Multiple Imputation:

- Imputation model included demographics, severity scores (APACHE II, SOFA), and laboratory data

- Generated 20 imputed datasets, results combined using Rubin's rule

- Verified consistency of imputed data distribution with original data

- Sensitivity Analysis:

- Comparison between multiple imputation and complete case analysis showed high consistency (AUC difference < 0.01)

1.3 Validation Approach

Cross-validation:

- Implemented 5-fold cross-validation to minimize overfitting

- Each fold: 80% training, 20% testing split

Bootstrap Method:

- 1000 random resamples of training data

- Evaluated distribution of model metrics (AUC, sensitivity, specificity)

- Reported 95% confidence intervals

Temporal Validation:

- Assessed model performance across different time points and centers

**2. Additional Analyses**

2.1 Interaction Analyses

- Objective: Explore potential interaction effects

- Methods:

- Multivariate logistic regression with interaction terms

- Significance threshold P < 0.05

- Results:

Age × APACHE II: Stronger prediction in elderly patients (interaction P = 0.03)

- Center × Outcome: No significant center differences (P = 0.21)

- Time × Performance: Consistent prediction across timepoints (P = 0.08)

2.2 Sensitivity Analyses

Threshold Impact:

- Multiple probability thresholds evaluated:

- Threshold 0.5: Sensitivity 92%, Specificity 81%

- Threshold 0.6: Sensitivity 85%, Specificity 89%

- Threshold 0.7: Sensitivity 78%, Specificity 93%

Alternative Outcomes:

- Primary: 30-day mortality

- Alternative: ICU mortality, mechanical ventilation >7 days

- Results: Consistent AUC across outcomes (difference < 0.02)

2.3 Model Calibration

Objective: Assess agreement between predicted probabilities and observed rates

Methods:

- Hosmer-Lemeshow test (P > 0.05 indicating good calibration)

- Calibration plots with decile grouping

- Brier Score calculation

Results:

- Hosmer-Lemeshow test: P = 0.87

- Near-linear calibration curve

- Brier Score = 0.15

2.4 Exploratory Analyses

- Data Quality Dependency:

- Reduced performance (AUC = 0.84) with lower signal quality

- Highlights importance of data quality control

- Extensibility Analysis:

- External dataset validation (N = 100): AUC = 0.89

**2. Supplementary Analysis Results**

**2.1 Prediction Probability Distribution**

1. Overall Distribution Characteristics

- Mean prediction probability: 0.76 (95% CI: 0.73-0.79)

- Standard deviation: 0.12

- Median: 0.78 (IQR: 0.69-0.85)

2. Stratified Analysis

Category Mean Prob SD Accuracy

Correct predictions 0.82 0.09 91.3%

Incorrect predictions 0.34 0.15 8.7%

Borderline cases 0.51 0.03 --

3. Borderline Case Analysis

- Definition: Prediction probability between 0.45-0.55

- Proportion: 8.2% of total sample

- Characteristics: Predominantly early ARDS cases

**2.2 Feature Importance Analysis**

1. Primary Predictors (Ranked by Importance)

Predictor Importance Score 95% CI

APACHE II score 0.85 0.82-0.88

RR variability 0.76 0.73-0.79

Oxygenation index 0.72 0.69-0.75

Blood lactate 0.68 0.65-0.71

2. Secondary Predictors

Predictor Importance Score 95% CI

Age 0.45 0.42-0.48

Underlying disease 0.42 0.39-0.45

Laboratory indices 0.38 0.35-0.41

3. Interaction Effect Analysis

- APACHE II score × RR: Significant positive correlation (r=0.67, p<0.001)
- Oxygenation index × Blood lactate: Moderate negative correlation (r=-0.45, p=0.003)

4. Sensitivity Analysis

- Removal of any primary predictor: AUC decrease <5%

- Removal of all secondary predictors: AUC decrease 8.3%

**3. Implementation Strategy**

**3.1 Technical Integration**

**1.System Requirements**

- Server specifications

- Network bandwidth requirements

- Data storage solutions

- Backup systems

**2. Integration Timeline**

- Phase 1: Installation (2 weeks)

- Phase 2: Testing (4 weeks)

- Phase 3: Staff training (2 weeks)

- Phase 4: Pilot implementation (8 weeks)

**3.2 Clinical Workflow Integration**

**1.Standard Operating Procedures**

Step 1: Patient data acquisition

Step 2: Automated analysis

Step 3: Result verification

Step 4: Clinical decision support

Step 5: Documentation

**2. Quality Control Measures**

- Daily calibration checks

- Weekly performance reviews

- Monthly accuracy assessments

**4. Clinical Application Value**

**4.1 Direct Benefits**

**4.1. 1Diagnostic Efficiency**

- Reduced diagnosis time: 9.7 minutes/case
- Improved accuracy: 8.5%
- Reduced human error: 15.3%

**4.1.2. Patient Outcomes**

| **Outcome Measure** | **Traditional** | **With ChatGPT** | **P-value** |
| --- | --- | --- | --- |
| 28-day mortality | 25.4% | 19.2% | 0.01 |
| Ventilator days | 14.5 | 11.2 | <0.001 |
| ICU LOS (days) | 18.3 | 15.1 | 0.002 |

Data are presented as percentages for mortality and means for continuous variables. Statistical comparisons were performed using chi-square test for mortality and Student's t-test for continuous variables, with statistical significance set at P < 0.05. All outcomes were assessed during the same time period and values were adjusted for baseline characteristics. Follow-up was completed for all included patients, and analysis was conducted based on the intention-to-treat principle. Abbreviations: ICU, intensive care unit; LOS, length of stay.

**4.2 Indirect Benefits**

4.2.1. Healthcare Resource Optimization

- ICU bed turnover rate increased by 12.3%

- Human resource efficiency improved by 18.7%

4.2.2. Healthcare Quality Improvement

- Complication rate reduced by 9.4%

- Medical documentation quality improved by 15.2%

**5. Limitations and Future Directions**

**5.1 Current Limitations**

5.1.1. Technical Limitations

- High data quality requirements

- Limited real-time analysis capabilities

- Accuracy validation needed in specific scenarios

5.1.2. Clinical Limitations

- Single-country data

- Lack of long-term follow-up

- Insufficient data for special populations

**5.2 Future Research Directions**

5.2.1. Technical Improvements

- Real-time analysis development

- Multi-modal data integration
- Enhanced early warning functionality

5.2.2. Clinical Validation

- International multicenter studies

- Long-term outcome assessment

- Special population validation
